# Supplementary material
Source: PubMed Central journal article supplement (PMC7011697)
Supplement: jgv-100-1515-s001.pdf [file jgv-100-1515-s001.pdf]

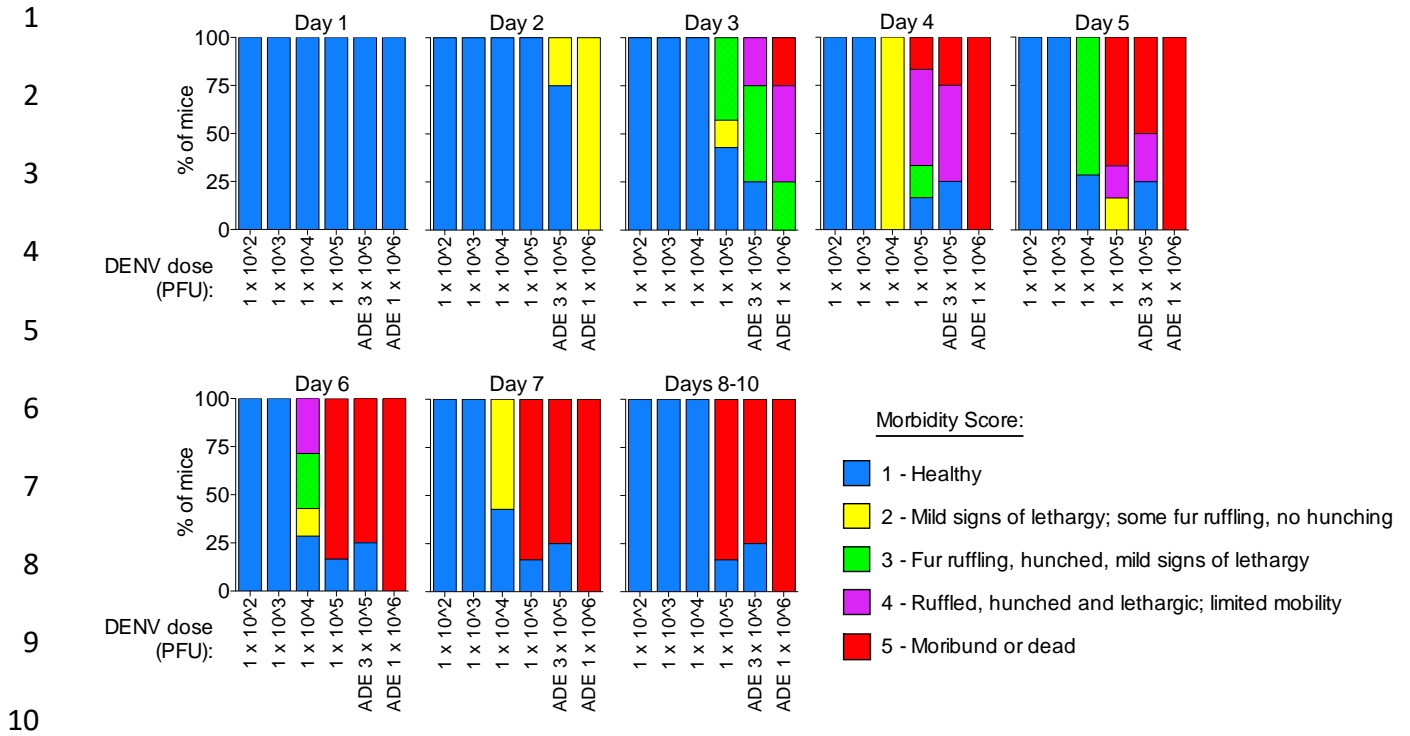

11 **SUPPLEMENTARY FIGURE 1. Morbidity in DENV2 D220-infected mice.** *Ifnar*<sup>-/-</sup> mice were  
 12 infected i.v. with different doses of DENV2 D220 and morbidity was scored for 10 days using a  
 13 standardized scoring scale. The percentage of each group of mice displaying the indicated signs is  
 14 shown. Data are combined from two similar experiments. ADE, antibody-dependent enhancement;  
 15 PFU, plaque-forming units.
